# Supplementary material
Source: PubMed Central journal article supplement (PMC3256871)
Supplement: supp_M111.309831_jbc.M111.309831-1.pdf [file supp_M111.309831_jbc.M111.309831-1.pdf]

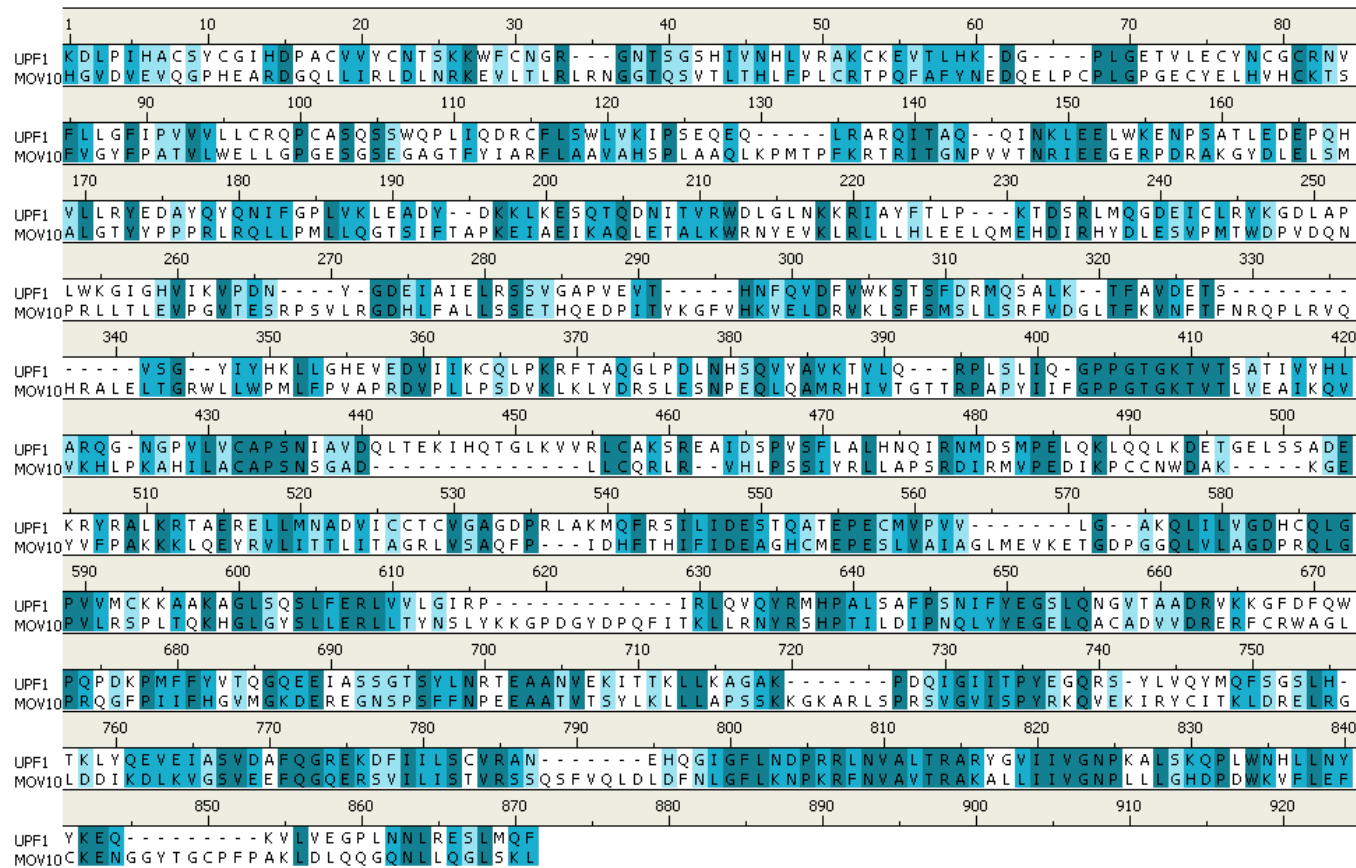

**Fig. S1. Amino acid sequence alignment of human UPF1 protein residues 116-913 and MOV10 residues 122-968.** It was preformed at Discovery Studio Client 2.5. The similar or identical residuals are showed in light blue or dark blue color respectively. The dash sign means deletion, and the sequence numbers are the actual residue numbers in their structures, which are different from their whole protein numbering.
